# Supplementary material
Source: PubMed Central journal article supplement (PMC2528057)
Supplement: NIHMS63713-supplement-3si20060925_03.pdf [file NIHMS63713-supplement-3si20060925_03.pdf]

## X-ray crystallographic data

Full crystallographic details have been deposited in cif-format with the Cambridge Crystallographic Data Centre, the CCDC deposition numbers are 284653 (LCoNH<sup>t</sup>Bu) and 299818 (LCoN<sup>t</sup>Bu). Copies of this information can be obtained free of charge from the Director, CCDC, 12 Union Road, Cambridge, CB21EZ, UK, Fax: +44-1223-336-033, e-mail: [deposit@ccdc.cam.ac.uk](mailto:deposit@ccdc.cam.ac.uk), Web: <http://www.ccdc.cam.ac.uk/conts/retrieving/html>.

### LCoNH<sup>t</sup>Bu Structure Determination.

Deep green crystals of LCoNH<sup>t</sup>Bu were grown from Et<sub>2</sub>O/hexamethyldisiloxane by diffusion at -35°C, shipped over dry ice and kept at -70°C for a few days. For the structure determination a prismatic crystal 0.30 x 0.15 x 0.10 mm in size was mounted on a standard Bruker X8 Apex2 CCD-based X-ray diffractometer equipped with an Oxford Cryostream 700 low temperature device. Intensities were measured at 203(2) K using graphite monochromatized Mo-K<sub>α</sub> radiation ( $\lambda = 0.71073 \text{ \AA}$ ). A full sphere of data, 2662 frames each at 5.500 cm detector distance, was collected with scan width of 0.50° in  $\omega$  and an exposure time of 15 s/frame. Analysis of the frames showed negligible decay during data collection. The data were integrated using the Bruker SAINT software package with a narrow frame algorithm<sup>1</sup> yielding a total of 32313 reflections of which 12109 independent. The SADABS program was used for the absorption correction.<sup>2</sup> The final cell constants were based on 6425 reflections with  $I > 10\sigma(I)$ .

The structure was solved by direct methods and refined by full matrix least-squares techniques with the SHELX97 software package.<sup>3</sup> The observed reflection condition (oko:  $k = 2n$ ) indicated P2<sub>1</sub>/m (#11) and P2<sub>1</sub> (#4) as possible space groups. Initial attempts to solve the structure within the higher symmetry P2<sub>1</sub>/m did not yield acceptable result, while solution in P2<sub>1</sub> resulted in starting R-factor of c.a. 19% and the refinement was consequently carried out in the latter space group. Initially all non-hydrogen atoms have been found and assigned from the Fourier maps and their thermal parameters refined anisotropically. Next, the hydrogen atoms have been added to the refinement as riding models and their thermal parameters refined isotropically. The amido hydrogen was located directly from the Fourier maps. Last, some positional disorder of a limited number of C- and N- atoms has been modeled and refined. After the refinement converged, a close examination of the solution as well as a test using the PLATON program confirmed the lack of possible higher symmetry.<sup>4</sup> The main crystallographic details are summarized in Table 1.

**Table 1.** Crystal data and structure refinement for **LCoNH<sup>t</sup>Bu**

|                                   |                                                                                                                        |
|-----------------------------------|------------------------------------------------------------------------------------------------------------------------|
| Empirical formula                 | C <sub>31</sub> H <sub>47</sub> B Co N <sub>7</sub>                                                                    |
| Formula weight                    | 587.54                                                                                                                 |
| Temperature                       | 203(2) K                                                                                                               |
| Wavelength                        | 0.71073 Å                                                                                                              |
| Crystal system, space group       | Monoclinic, P 2 <sub>1</sub> (#4)                                                                                      |
| Unit cell dimensions              | a = 15.777(3) Å    alpha = 90 deg.<br>b = 11.349(2) Å    beta = 105.160(10) deg.<br>c = 30.139(6) Å    gamma = 90 deg. |
| Volume, Z                         | 5208.7(17) Å <sup>3</sup> , 6                                                                                          |
| Calculated density                | 1.125 g/cm <sup>3</sup>                                                                                                |
| Absorption coefficient            | 0.523 mm <sup>-1</sup>                                                                                                 |
| F(000)                            | 1889                                                                                                                   |
| Crystal size                      | 0.30 x 0.15 x 0.10 mm                                                                                                  |
| Theta range for data collection   | 0.70 to 22.00 deg.                                                                                                     |
| Limiting indices                  | -16<=h<=16, -11<=k<=11, -31<=l<=31                                                                                     |
| Reflections collected / unique    | 32313 / 12109 [R(int) = 0.0352]                                                                                        |
| Refinement method                 | Full-matrix least-squares on F <sup>2</sup>                                                                            |
| Data / parameters                 | 12109 / 1127                                                                                                           |
| Goodness-of-fit on F <sup>2</sup> | 1.089                                                                                                                  |
| Final R indices [I>2σ(I)]         | <sup>a</sup> R1 = 0.0537, <sup>b</sup> Rw2 = 0.1563                                                                    |
| R indices (all data)              | R1 = 0.0657, wR2 = 0.1664                                                                                              |

---

<sup>a</sup> R1 =  $\sum |F_o| - |F_c| / \sum |F_o|$  (based on reflections with I > 2σ(I))<sup>b</sup> R<sub>w</sub>2 =  $[\sum w(|F_o| - |F_c|)^2 / \sum w|F_o|^2]^{1/2}$ ; w = 1 / [σ<sup>2</sup>(F<sub>o</sub><sup>2</sup>) + (0.1181P)<sup>2</sup>];  
P = [Max(F<sub>o</sub><sup>2</sup>, 0) + 2F<sub>c</sub><sup>2</sup>]/3 (all data)

**Table 2.** Atomic coordinates ( $\times 10^4$ ) and equivalent isotropic displacement parameters ( $\text{\AA}^2 \times 10^3$ ) for **LCoNH<sup>t</sup>Bu**.

U(eq) is defined as one third of the trace of the orthogonalized Uij tensor.

| Atom  | x        | y        | z       | U(eq) |
|-------|----------|----------|---------|-------|
| Co(1) | -4464(1) | 4319(1)  | 7366(1) | 34(1) |
| B(1)  | -4219(5) | 6490(7)  | 8008(3) | 35(2) |
| N(1)  | -4800(3) | 6837(5)  | 7508(2) | 34(1) |
| N(2)  | -5520(4) | 6614(5)  | 6803(2) | 38(1) |
| C(1)  | -4980(4) | 6024(6)  | 7161(2) | 33(2) |
| C(2)  | -5258(4) | 7858(6)  | 7368(2) | 40(2) |
| C(3)  | -5689(5) | 7728(6)  | 6939(2) | 42(2) |
| C(4)  | -5880(5) | 6105(7)  | 6338(2) | 45(2) |
| C(5)  | -6380(7) | 7077(9)  | 6010(3) | 84(3) |
| C(6)  | -5098(5) | 5683(7)  | 6165(2) | 50(2) |
| C(7)  | -6507(5) | 5130(8)  | 6369(3) | 63(2) |
| N(3)  | -3327(3) | 5943(5)  | 7958(2) | 33(1) |
| N(4)  | -2369(3) | 4873(5)  | 7739(2) | 39(1) |
| C(8)  | -3252(4) | 5012(6)  | 7692(2) | 36(2) |
| C(9)  | -2495(4) | 6401(6)  | 8166(2) | 41(2) |
| C(10) | -1912(5) | 5761(7)  | 8029(2) | 47(2) |
| C(11) | -1965(4) | 3972(6)  | 7502(3) | 46(2) |
| C(12) | -2325(6) | 2817(8)  | 7586(4) | 83(3) |
| C(13) | -2203(7) | 4294(11) | 6985(3) | 97(4) |
| C(14) | -975(5)  | 3984(10) | 7683(4) | 88(3) |
| N(5)  | -4798(3) | 5497(5)  | 8157(2) | 32(1) |
| N(6)  | -5498(3) | 3869(5)  | 8167(2) | 32(1) |
| C(15) | -4930(4) | 4432(6)  | 7956(2) | 31(2) |
| C(16) | -5318(4) | 5626(6)  | 8463(2) | 33(2) |
| C(17) | -5737(4) | 4622(6)  | 8475(2) | 33(2) |
| C(18) | -5739(4) | 2589(6)  | 8105(2) | 41(2) |
| C(19) | -6223(5) | 2355(7)  | 7606(2) | 49(2) |
| C(20) | -4890(5) | 1878(6)  | 8239(3) | 51(2) |
| C(21) | -6342(5) | 2260(8)  | 8405(3) | 62(2) |
| C(22) | -3955(4) | 7547(6)  | 8381(2) | 37(2) |
| C(23) | -3740(5) | 8678(7)  | 8268(3) | 52(2) |
| C(24) | -3338(5) | 9467(7)  | 8594(4) | 63(2) |
| C(25) | -3132(5) | 9197(9)  | 9040(3) | 63(2) |
| C(26) | -3331(5) | 8101(9)  | 9161(3) | 64(3) |
| C(27) | -3728(4) | 7286(7)  | 8843(2) | 43(2) |
| N(97) | -4771(5) | 3186(6)  | 6894(2) | 68(2) |

|        |          |          |           |        |
|--------|----------|----------|-----------|--------|
| C(28)  | -4759(5) | 2014(6)  | 6705(2)   | 47(2)  |
| C(29)  | -4217(6) | 1953(8)  | 6362(3)   | 72(3)  |
| C(30)  | -5687(7) | 1661(11) | 6470(3)   | 91(3)  |
| C(31)  | -4436(7) | 1141(8)  | 7080(3)   | 81(3)  |
| Co(2)  | -2021(1) | 5341(1)  | 10642(1)  | 32(1)  |
| B(2)   | -4033(4) | 5692(6)  | 10290(2)  | 30(2)  |
| N(8)   | -3811(3) | 4935(4)  | 10734(2)  | 28(1)  |
| N(9)   | -3018(3) | 4177(5)  | 11375(2)  | 33(1)  |
| C(32)  | -2948(4) | 4752(6)  | 10991(2)  | 34(2)  |
| C(33)  | -4394(4) | 4401(6)  | 10954(2)  | 35(2)  |
| C(34)  | -3894(4) | 3954(6)  | 11355(2)  | 39(2)  |
| C(35)  | -2283(5) | 3831(7)  | 11765(2)  | 50(2)  |
| C(36)  | -2627(6) | 3626(9)  | 12189(3)  | 74(3)  |
| C(37)  | -1594(5) | 4797(8)  | 11867(3)  | 61(2)  |
| C(38)  | -1903(6) | 2689(8)  | 11642(3)  | 78(3)  |
| N(10)  | -3502(3) | 6879(4)  | 10401(2)  | 29(1)  |
| N(11)  | -2444(3) | 8140(5)  | 10642(2)  | 35(1)  |
| C(39)  | -2615(4) | 6976(6)  | 10576(2)  | 33(2)  |
| C(40)  | -3867(4) | 8009(5)  | 10342(2)  | 30(2)  |
| C(41)  | -3218(4) | 8790(6)  | 10484(2)  | 39(2)  |
| C(42)  | -1552(5) | 8659(7)  | 10824(3)  | 56(2)  |
| C(43)  | -1017(7) | 8410(14) | 10499(5)  | 131(5) |
| C(44)  | -1128(7) | 8028(11) | 11259(4)  | 127(5) |
| C(45)  | -1612(7) | 9948(9)  | 10915(7)  | 183(9) |
| N(12)  | -3657(3) | 5019(4)  | 9932(2)   | 31(1)  |
| N(13)  | -2704(3) | 4360(5)  | 9582(2)   | 33(1)  |
| C(46)  | -2772(4) | 4865(5)  | 9986(2)   | 32(2)  |
| C(47)  | -4119(4) | 4562(5)  | 9511(2)   | 33(2)  |
| C(48)  | -3518(4) | 4164(6)  | 9293(2)   | 37(2)  |
| C(49)  | -1836(4) | 4120(6)  | 9472(2)   | 42(2)  |
| C(50)  | -1310(4) | 3264(7)  | 9824(3)   | 49(2)  |
| C(51)  | -1353(5) | 5293(7)  | 9495(3)   | 59(2)  |
| C(52)  | -2055(6) | 3576(9)  | 8979(3)   | 70(3)  |
| C(53)  | -5065(4) | 6059(5)  | 10094(2)  | 27(1)  |
| C(54)  | -5647(4) | 6199(6)  | 10372(2)  | 33(2)  |
| C(55)  | -6495(4) | 6648(6)  | 10205(2)  | 38(2)  |
| C(56)  | -6782(4) | 6992(6)  | 9756(2)   | 40(2)  |
| C(57)  | -6216(4) | 6921(5)  | 9473(2)   | 35(2)  |
| C(58)  | -5369(4) | 6483(6)  | 9646(2)   | 34(2)  |
| N(98)  | -836(4)  | 4964(12) | 10870(3)  | 126(5) |
| C(59)  | 49(5)    | 4764(8)  | 10986(3)  | 63(2)  |
| C(60A) | 412(18)  | 3480(30) | 10900(20) | 80(20) |
| C(60B) | 10(20)   | 3390(30) | 11071(9)  | 86(12) |
| C(61)  | 561(6)   | 5330(13) | 11453(4)  | 79(4)  |
| C(62A) | 540(30)  | 5210(60) | 10637(14) | 95(13) |
| C(62B) | 260(30)  | 5190(70) | 10549(16) | 90(20) |

|        |           |          |          |        |
|--------|-----------|----------|----------|--------|
| Co(3)  | -1761(1)  | 7248(1)  | 5879(1)  | 35(1)  |
| B(3)   | -16(5)    | 6137(8)  | 6449(3)  | 37(2)  |
| N(15)  | 149(3)    | 6929(5)  | 6052(2)  | 35(1)  |
| N(16)  | -109(4)   | 8181(6)  | 5479(2)  | 45(2)  |
| C(63)  | -506(5)   | 7628(6)  | 5782(2)  | 40(2)  |
| C(64)  | 894(4)    | 6992(7)  | 5895(3)  | 47(2)  |
| C(65)  | 737(5)    | 7752(7)  | 5537(3)  | 50(2)  |
| C(66)  | -517(5)   | 9058(7)  | 5129(2)  | 51(2)  |
| C(67)  | 190(6)    | 9753(11) | 4984(4)  | 93(4)  |
| C(68)  | -1020(6)  | 9907(9)  | 5339(3)  | 88(3)  |
| C(69)  | -1034(7)  | 8463(11) | 4739(3)  | 98(4)  |
| N(17)  | -500(3)   | 6883(5)  | 6747(2)  | 30(1)  |
| N(18)  | -1463(3)  | 7956(5)  | 6964(2)  | 35(1)  |
| C(70)  | -1289(4)  | 7430(6)  | 6587(2)  | 35(2)  |
| C(71)  | -189(4)   | 7085(7)  | 7204(2)  | 40(2)  |
| C(72)  | -803(5)   | 7718(6)  | 7338(2)  | 46(2)  |
| C(73)  | -2282(5)  | 8618(6)  | 6963(2)  | 47(2)  |
| C(74)  | -3076(5)  | 7756(8)  | 6842(3)  | 64(2)  |
| C(75)  | -2387(6)  | 9590(7)  | 6599(3)  | 63(2)  |
| C(76)  | -2234(5)  | 9137(8)  | 7426(3)  | 61(2)  |
| N(19)  | -686(3)   | 5155(5)  | 6184(2)  | 33(1)  |
| N(20)  | -1845(3)  | 4398(6)  | 5741(2)  | 43(2)  |
| C(77)  | -1493(4)  | 5438(6)  | 5920(2)  | 33(2)  |
| C(78)  | -533(5)   | 3978(7)  | 6147(2)  | 46(2)  |
| C(79)  | -1251(5)  | 3488(7)  | 5884(2)  | 46(2)  |
| C(80)  | -2752(4)  | 4268(7)  | 5424(2)  | 48(2)  |
| C(81)  | -2778(5)  | 4876(9)  | 4973(3)  | 68(3)  |
| C(82)  | -3406(5)  | 4797(8)  | 5647(3)  | 67(2)  |
| C(83)  | -2946(5)  | 2931(8)  | 5353(4)  | 82(3)  |
| C(84)  | 854(4)    | 5620(6)  | 6788(2)  | 39(2)  |
| C(85)  | 1643(4)   | 6227(7)  | 6903(2)  | 50(2)  |
| C(86)  | 2366(5)   | 5878(10) | 7272(3)  | 72(3)  |
| C(87)  | 2299(7)   | 4926(11) | 7528(4)  | 87(3)  |
| C(88)  | 1510(7)   | 4278(9)  | 7427(3)  | 78(3)  |
| C(89)  | 788(5)    | 4652(7)  | 7054(3)  | 56(2)  |
| C(90)  | -6442(4)  | 3445(7)  | 4729(3)  | 52(2)  |
| N(97)  | -2890(11) | 7888(18) | 5625(6)  | 57(5)  |
| C(91A) | -3368(18) | 8160(20) | 4798(7)  | 92(7)  |
| C(91B) | -4010(12) | 8050(20) | 4783(7)  | 77(7)  |
| C(92)  | -6433(8)  | 4745(10) | 4754(4)  | 75(4)  |
| C(93A) | -5451(19) | 2900(40) | 4724(16) | 60(50) |
| C(93B) | -5805(11) | 3250(20) | 4419(7)  | 73(6)  |

---

**Table 3.** Bond lengths [ $\text{\AA}$ ] and angles [deg] for **LCoNH<sup>t</sup>Bu**.

---

|             |           |
|-------------|-----------|
| Co(1)-N(97) | 1.886(7)  |
| Co(1)-C(8)  | 2.064(7)  |
| Co(1)-C(15) | 2.099(6)  |
| Co(1)-C(1)  | 2.128(7)  |
| B(1)-N(3)   | 1.579(9)  |
| B(1)-N(5)   | 1.589(9)  |
| B(1)-N(1)   | 1.595(9)  |
| B(1)-C(22)  | 1.621(10) |
| N(1)-C(1)   | 1.368(8)  |
| N(1)-C(2)   | 1.373(8)  |
| N(2)-C(1)   | 1.363(8)  |
| N(2)-C(3)   | 1.377(9)  |
| N(2)-C(4)   | 1.485(9)  |
| C(2)-C(3)   | 1.303(9)  |
| C(4)-C(7)   | 1.504(11) |
| C(4)-C(6)   | 1.536(10) |
| C(4)-C(5)   | 1.552(11) |
| N(3)-C(8)   | 1.351(8)  |
| N(3)-C(9)   | 1.398(8)  |
| N(4)-C(8)   | 1.371(8)  |
| N(4)-C(10)  | 1.404(9)  |
| N(4)-C(11)  | 1.483(9)  |
| C(9)-C(10)  | 1.322(10) |
| C(11)-C(12) | 1.476(12) |
| C(11)-C(14) | 1.513(11) |
| C(11)-C(13) | 1.547(11) |
| N(5)-C(15)  | 1.343(8)  |
| N(5)-C(16)  | 1.392(8)  |
| N(6)-C(15)  | 1.382(8)  |
| N(6)-C(17)  | 1.387(8)  |
| N(6)-C(18)  | 1.501(9)  |
| C(16)-C(17) | 1.323(9)  |
| C(18)-C(19) | 1.520(9)  |
| C(18)-C(21) | 1.521(9)  |
| C(18)-C(20) | 1.526(10) |
| C(22)-C(27) | 1.377(9)  |
| C(22)-C(23) | 1.393(10) |
| C(23)-C(24) | 1.358(11) |
| C(24)-C(25) | 1.333(12) |
| C(25)-C(26) | 1.357(13) |
| C(26)-C(27) | 1.361(11) |
| N(97)-C(28) | 1.448(10) |
| C(28)-C(31) | 1.489(11) |

|              |           |
|--------------|-----------|
| C(28)-C(30)  | 1.505(12) |
| C(28)-C(29)  | 1.505(11) |
| Co(2)-N(98)  | 1.865(6)  |
| Co(2)-C(39)  | 2.066(7)  |
| Co(2)-C(46)  | 2.093(6)  |
| Co(2)-C(32)  | 2.120(7)  |
| B(2)-N(8)    | 1.551(9)  |
| B(2)-N(12)   | 1.560(9)  |
| B(2)-N(10)   | 1.575(9)  |
| B(2)-C(53)   | 1.635(9)  |
| N(8)-C(32)   | 1.394(8)  |
| N(8)-C(33)   | 1.404(8)  |
| N(9)-C(32)   | 1.359(8)  |
| N(9)-C(34)   | 1.390(8)  |
| N(9)-C(35)   | 1.472(9)  |
| C(33)-C(34)  | 1.356(9)  |
| C(35)-C(38)  | 1.514(11) |
| C(35)-C(37)  | 1.517(11) |
| C(35)-C(36)  | 1.534(11) |
| N(10)-C(39)  | 1.365(8)  |
| N(10)-C(40)  | 1.398(8)  |
| N(11)-C(39)  | 1.352(9)  |
| N(11)-C(41)  | 1.399(8)  |
| N(11)-C(42)  | 1.491(9)  |
| C(40)-C(41)  | 1.337(9)  |
| C(42)-C(43)  | 1.480(14) |
| C(42)-C(44)  | 1.490(14) |
| C(42)-C(45)  | 1.496(13) |
| N(12)-C(46)  | 1.373(8)  |
| N(12)-C(47)  | 1.388(8)  |
| N(13)-C(48)  | 1.368(8)  |
| N(13)-C(46)  | 1.377(8)  |
| N(13)-C(49)  | 1.515(8)  |
| C(47)-C(48)  | 1.364(9)  |
| C(49)-C(50)  | 1.514(10) |
| C(49)-C(51)  | 1.527(11) |
| C(49)-C(52)  | 1.562(11) |
| C(53)-C(58)  | 1.395(8)  |
| C(53)-C(54)  | 1.406(8)  |
| C(54)-C(55)  | 1.397(9)  |
| C(55)-C(56)  | 1.367(10) |
| C(56)-C(57)  | 1.389(9)  |
| C(57)-C(58)  | 1.393(9)  |
| N(98)-C(59)  | 1.367(10) |
| C(59)-C(62B) | 1.52(5)   |
| C(59)-C(62A) | 1.54(4)   |

|               |           |
|---------------|-----------|
| C(59)-C(61)   | 1.566(13) |
| C(59)-C(60B)  | 1.59(3)   |
| C(59)-C(60A)  | 1.61(4)   |
| C(60A)-C(60B) | 0.92(4)   |
| Co(3)-N(99B)  | 1.87(2)   |
| Co(3)-N(99A)  | 1.891(18) |
| Co(3)-C(70)   | 2.080(6)  |
| Co(3)-C(77)   | 2.095(7)  |
| Co(3)-C(63)   | 2.119(7)  |
| B(3)-N(15)    | 1.571(10) |
| B(3)-N(17)    | 1.570(9)  |
| B(3)-C(84)    | 1.592(10) |
| B(3)-N(19)    | 1.600(9)  |
| N(15)-C(64)   | 1.379(8)  |
| N(15)-C(63)   | 1.385(9)  |
| N(16)-C(65)   | 1.387(9)  |
| N(16)-C(63)   | 1.387(9)  |
| N(16)-C(66)   | 1.470(9)  |
| C(64)-C(65)   | 1.354(10) |
| C(66)-C(69)   | 1.414(13) |
| C(66)-C(68)   | 1.491(12) |
| C(66)-C(67)   | 1.520(12) |
| N(17)-C(71)   | 1.356(8)  |
| N(17)-C(70)   | 1.361(8)  |
| N(18)-C(72)   | 1.346(8)  |
| N(18)-C(70)   | 1.373(8)  |
| N(18)-C(73)   | 1.494(8)  |
| C(71)-C(72)   | 1.349(10) |
| C(73)-C(76)   | 1.499(10) |
| C(73)-C(75)   | 1.533(11) |
| C(73)-C(74)   | 1.556(11) |
| N(19)-C(77)   | 1.351(8)  |
| N(19)-C(78)   | 1.367(9)  |
| N(20)-C(77)   | 1.355(9)  |
| N(20)-C(79)   | 1.386(9)  |
| N(20)-C(80)   | 1.506(8)  |
| C(78)-C(79)   | 1.323(10) |
| C(80)-C(82)   | 1.497(10) |
| C(80)-C(81)   | 1.515(11) |
| C(80)-C(83)   | 1.551(12) |
| C(84)-C(89)   | 1.380(10) |
| C(84)-C(85)   | 1.385(10) |
| C(85)-C(86)   | 1.427(12) |
| C(86)-C(87)   | 1.347(15) |
| C(87)-C(88)   | 1.410(15) |
| C(88)-C(89)   | 1.439(11) |



|                 |           |
|-----------------|-----------|
| C(90)-N(99A)#1  | 1.434(19) |
| C(90)-N(99B)#1  | 1.47(2)   |
| C(90)-C(92)     | 1.477(14) |
| C(90)-C(91B)#1  | 1.526(19) |
| C(90)-C(93B)    | 1.557(18) |
| C(90)-C(91A)#1  | 1.57(3)   |
| C(90)-C(93A)    | 1.69(3)   |
| N(99A)-N(99B)   | 0.744(16) |
| N(99A)-C(90)#2  | 1.434(19) |
| N(99B)-C(90)#2  | 1.47(2)   |
| C(91A)-C(91B)   | 1.01(3)   |
| C(91A)-C(90)#2  | 1.57(3)   |
| C(91B)-C(90)#2  | 1.526(19) |
| C(91B)-C(93A)#2 | 1.90(5)   |
| C(93A)-C(93B)   | 1.02(5)   |
| C(93A)-C(91B)#1 | 1.90(5)   |

|                   |          |
|-------------------|----------|
| N(97)-Co(1)-C(8)  | 130.0(3) |
| N(97)-Co(1)-C(15) | 127.1(3) |
| C(8)-Co(1)-C(15)  | 93.4(2)  |
| N(97)-Co(1)-C(1)  | 113.4(3) |
| C(8)-Co(1)-C(1)   | 91.6(2)  |
| C(15)-Co(1)-C(1)  | 89.9(2)  |
| N(3)-B(1)-N(5)    | 109.9(5) |
| N(3)-B(1)-N(1)    | 108.3(5) |
| N(5)-B(1)-N(1)    | 102.2(5) |
| N(3)-B(1)-C(22)   | 106.4(5) |
| N(5)-B(1)-C(22)   | 113.0(5) |
| N(1)-B(1)-C(22)   | 116.9(6) |
| C(1)-N(1)-C(2)    | 110.2(5) |
| C(1)-N(1)-B(1)    | 120.6(5) |
| C(2)-N(1)-B(1)    | 128.7(5) |
| C(1)-N(2)-C(3)    | 110.2(5) |
| C(1)-N(2)-C(4)    | 124.2(6) |
| C(3)-N(2)-C(4)    | 125.6(5) |
| N(2)-C(1)-N(1)    | 103.7(5) |
| N(2)-C(1)-Co(1)   | 142.1(5) |
| N(1)-C(1)-Co(1)   | 113.8(4) |
| C(3)-C(2)-N(1)    | 107.9(6) |
| C(2)-C(3)-N(2)    | 107.9(6) |
| N(2)-C(4)-C(7)    | 108.9(6) |
| N(2)-C(4)-C(6)    | 107.4(5) |
| C(7)-C(4)-C(6)    | 113.1(6) |
| N(2)-C(4)-C(5)    | 109.3(6) |
| C(7)-C(4)-C(5)    | 109.2(7) |
| C(6)-C(4)-C(5)    | 109.0(6) |

|                   |          |
|-------------------|----------|
| C(8)-N(3)-C(9)    | 109.8(5) |
| C(8)-N(3)-B(1)    | 125.6(5) |
| C(9)-N(3)-B(1)    | 124.5(5) |
| C(8)-N(4)-C(10)   | 108.9(6) |
| C(8)-N(4)-C(11)   | 125.7(6) |
| C(10)-N(4)-C(11)  | 125.3(5) |
| N(3)-C(8)-N(4)    | 105.9(6) |
| N(3)-C(8)-Co(1)   | 111.5(4) |
| N(4)-C(8)-Co(1)   | 142.6(5) |
| C(10)-C(9)-N(3)   | 107.7(6) |
| C(9)-C(10)-N(4)   | 107.6(6) |
| C(12)-C(11)-N(4)  | 107.2(6) |
| C(12)-C(11)-C(14) | 110.7(7) |
| N(4)-C(11)-C(14)  | 110.7(6) |
| C(12)-C(11)-C(13) | 112.3(8) |
| N(4)-C(11)-C(13)  | 107.4(6) |
| C(14)-C(11)-C(13) | 108.5(7) |
| C(15)-N(5)-C(16)  | 110.1(5) |
| C(15)-N(5)-B(1)   | 123.0(5) |
| C(16)-N(5)-B(1)   | 126.5(5) |
| C(15)-N(6)-C(17)  | 110.3(5) |
| C(15)-N(6)-C(18)  | 124.4(5) |
| C(17)-N(6)-C(18)  | 125.1(5) |
| N(5)-C(15)-N(6)   | 104.6(5) |
| N(5)-C(15)-Co(1)  | 112.9(4) |
| N(6)-C(15)-Co(1)  | 140.7(5) |
| C(17)-C(16)-N(5)  | 108.3(6) |
| C(16)-C(17)-N(6)  | 106.5(5) |
| N(6)-C(18)-C(19)  | 109.7(5) |
| N(6)-C(18)-C(21)  | 110.0(6) |
| C(19)-C(18)-C(21) | 108.4(6) |
| N(6)-C(18)-C(20)  | 107.6(5) |
| C(19)-C(18)-C(20) | 110.4(6) |
| C(21)-C(18)-C(20) | 110.8(6) |
| C(27)-C(22)-C(23) | 115.5(7) |
| C(27)-C(22)-B(1)  | 119.6(6) |
| C(23)-C(22)-B(1)  | 123.2(6) |
| C(24)-C(23)-C(22) | 121.8(8) |
| C(25)-C(24)-C(23) | 121.6(8) |
| C(24)-C(25)-C(26) | 118.0(8) |
| C(25)-C(26)-C(27) | 121.9(9) |
| C(26)-C(27)-C(22) | 121.1(8) |
| C(28)-N(97)-Co(1) | 153.5(6) |
| N(97)-C(28)-C(31) | 110.5(7) |
| N(97)-C(28)-C(30) | 108.5(7) |
| C(31)-C(28)-C(30) | 106.1(8) |

|                   |           |
|-------------------|-----------|
| N(97)-C(28)-C(29) | 112.3(7)  |
| C(31)-C(28)-C(29) | 110.3(7)  |
| C(30)-C(28)-C(29) | 108.8(7)  |
| N(98)-Co(2)-C(39) | 128.9(4)  |
| N(98)-Co(2)-C(46) | 123.6(3)  |
| C(39)-Co(2)-C(46) | 90.5(2)   |
| N(98)-Co(2)-C(32) | 120.1(4)  |
| C(39)-Co(2)-C(32) | 88.7(2)   |
| C(46)-Co(2)-C(32) | 95.3(2)   |
| N(8)-B(2)-N(12)   | 106.6(5)  |
| N(8)-B(2)-N(10)   | 107.6(5)  |
| N(12)-B(2)-N(10)  | 106.7(5)  |
| N(8)-B(2)-C(53)   | 115.5(5)  |
| N(12)-B(2)-C(53)  | 113.4(5)  |
| N(10)-B(2)-C(53)  | 106.4(5)  |
| C(32)-N(8)-C(33)  | 109.7(5)  |
| C(32)-N(8)-B(2)   | 121.9(5)  |
| C(33)-N(8)-B(2)   | 128.3(5)  |
| C(32)-N(9)-C(34)  | 110.5(5)  |
| C(32)-N(9)-C(35)  | 125.8(5)  |
| C(34)-N(9)-C(35)  | 123.6(5)  |
| N(9)-C(32)-N(8)   | 105.0(5)  |
| N(9)-C(32)-Co(2)  | 142.5(5)  |
| N(8)-C(32)-Co(2)  | 112.2(4)  |
| C(34)-C(33)-N(8)  | 106.4(5)  |
| C(33)-C(34)-N(9)  | 108.1(6)  |
| N(9)-C(35)-C(38)  | 108.3(6)  |
| N(9)-C(35)-C(37)  | 110.0(6)  |
| C(38)-C(35)-C(37) | 111.1(7)  |
| N(9)-C(35)-C(36)  | 109.2(6)  |
| C(38)-C(35)-C(36) | 108.8(7)  |
| C(37)-C(35)-C(36) | 109.4(7)  |
| C(39)-N(10)-C(40) | 108.7(5)  |
| C(39)-N(10)-B(2)  | 125.9(5)  |
| C(40)-N(10)-B(2)  | 125.4(5)  |
| C(39)-N(11)-C(41) | 110.0(5)  |
| C(39)-N(11)-C(42) | 124.9(6)  |
| C(41)-N(11)-C(42) | 124.9(6)  |
| N(11)-C(39)-N(10) | 106.3(5)  |
| N(11)-C(39)-Co(2) | 142.7(5)  |
| N(10)-C(39)-Co(2) | 111.0(4)  |
| C(41)-C(40)-N(10) | 108.2(5)  |
| C(40)-C(41)-N(11) | 106.6(6)  |
| C(43)-C(42)-N(11) | 109.1(7)  |
| C(43)-C(42)-C(44) | 106.8(10) |
| N(11)-C(42)-C(44) | 107.3(7)  |

|                     |           |
|---------------------|-----------|
| C(43)-C(42)-C(45)   | 112.5(12) |
| N(11)-C(42)-C(45)   | 110.8(7)  |
| C(44)-C(42)-C(45)   | 110.1(11) |
| C(46)-N(12)-C(47)   | 109.7(5)  |
| C(46)-N(12)-B(2)    | 122.5(5)  |
| C(47)-N(12)-B(2)    | 127.7(5)  |
| C(48)-N(13)-C(46)   | 110.7(5)  |
| C(48)-N(13)-C(49)   | 125.7(5)  |
| C(46)-N(13)-C(49)   | 123.5(5)  |
| N(12)-C(46)-N(13)   | 105.0(5)  |
| N(12)-C(46)-Co(2)   | 112.8(4)  |
| N(13)-C(46)-Co(2)   | 142.0(4)  |
| C(48)-C(47)-N(12)   | 107.4(5)  |
| C(47)-C(48)-N(13)   | 107.1(5)  |
| C(50)-C(49)-N(13)   | 108.9(5)  |
| C(50)-C(49)-C(51)   | 110.7(6)  |
| N(13)-C(49)-C(51)   | 107.5(6)  |
| C(50)-C(49)-C(52)   | 110.9(6)  |
| N(13)-C(49)-C(52)   | 106.9(5)  |
| C(51)-C(49)-C(52)   | 111.7(6)  |
| C(58)-C(53)-C(54)   | 115.3(5)  |
| C(58)-C(53)-B(2)    | 119.7(5)  |
| C(54)-C(53)-B(2)    | 123.9(5)  |
| C(55)-C(54)-C(53)   | 122.6(6)  |
| C(56)-C(55)-C(54)   | 120.0(6)  |
| C(55)-C(56)-C(57)   | 119.4(6)  |
| C(56)-C(57)-C(58)   | 120.0(6)  |
| C(57)-C(58)-C(53)   | 122.5(6)  |
| C(59)-N(98)-Co(2)   | 172.4(9)  |
| N(98)-C(59)-C(62B)  | 99.6(19)  |
| N(98)-C(59)-C(62A)  | 115(2)    |
| C(62B)-C(59)-C(62A) | 17(3)     |
| N(98)-C(59)-C(61)   | 114.5(8)  |
| C(62B)-C(59)-C(61)  | 117.9(19) |
| C(62A)-C(59)-C(61)  | 104.4(17) |
| N(98)-C(59)-C(60B)  | 97.0(14)  |
| C(62B)-C(59)-C(60B) | 119(3)    |
| C(62A)-C(59)-C(60B) | 119(3)    |
| C(61)-C(59)-C(60B)  | 107.0(13) |
| N(98)-C(59)-C(60A)  | 119.4(14) |
| C(62B)-C(59)-C(60A) | 89(3)     |
| C(62A)-C(59)-C(60A) | 86(3)     |
| C(61)-C(59)-C(60A)  | 113(2)    |
| C(60B)-C(59)-C(60A) | 33.4(14)  |
| C(60B)-C(60A)-C(59) | 72(3)     |
| C(60A)-C(60B)-C(59) | 75(4)     |

|                     |          |
|---------------------|----------|
| N(99B)-Co(3)-N(99A) | 22.8(5)  |
| N(99B)-Co(3)-C(70)  | 130.8(6) |
| N(99A)-Co(3)-C(70)  | 115.1(6) |
| N(99B)-Co(3)-C(77)  | 129.0(7) |
| N(99A)-Co(3)-C(77)  | 123.7(7) |
| C(70)-Co(3)-C(77)   | 91.4(3)  |
| N(99B)-Co(3)-C(63)  | 111.2(7) |
| N(99A)-Co(3)-C(63)  | 133.0(5) |
| C(70)-Co(3)-C(63)   | 91.4(2)  |
| C(77)-Co(3)-C(63)   | 91.5(3)  |
| N(15)-B(3)-N(17)    | 109.2(6) |
| N(15)-B(3)-C(84)    | 114.3(5) |
| N(17)-B(3)-C(84)    | 107.5(5) |
| N(15)-B(3)-N(19)    | 103.6(5) |
| N(17)-B(3)-N(19)    | 107.8(5) |
| C(84)-B(3)-N(19)    | 114.2(6) |
| C(64)-N(15)-C(63)   | 109.9(6) |
| C(64)-N(15)-B(3)    | 128.1(6) |
| C(63)-N(15)-B(3)    | 121.9(5) |
| C(65)-N(16)-C(63)   | 110.1(6) |
| C(65)-N(16)-C(66)   | 123.6(6) |
| C(63)-N(16)-C(66)   | 126.2(6) |
| N(15)-C(63)-N(16)   | 104.5(6) |
| N(15)-C(63)-Co(3)   | 112.5(4) |
| N(16)-C(63)-Co(3)   | 141.5(5) |
| C(65)-C(64)-N(15)   | 108.2(6) |
| C(64)-C(65)-N(16)   | 107.0(6) |
| C(69)-C(66)-N(16)   | 108.8(8) |
| C(69)-C(66)-C(68)   | 113.9(8) |
| N(16)-C(66)-C(68)   | 108.3(6) |
| C(69)-C(66)-C(67)   | 108.5(8) |
| N(16)-C(66)-C(67)   | 109.9(6) |
| C(68)-C(66)-C(67)   | 107.4(8) |
| C(71)-N(17)-C(70)   | 109.8(5) |
| C(71)-N(17)-B(3)    | 124.8(5) |
| C(70)-N(17)-B(3)    | 125.4(5) |
| C(72)-N(18)-C(70)   | 109.1(5) |
| C(72)-N(18)-C(73)   | 125.6(6) |
| C(70)-N(18)-C(73)   | 125.2(5) |
| N(17)-C(70)-N(18)   | 105.5(5) |
| N(17)-C(70)-Co(3)   | 111.6(4) |
| N(18)-C(70)-Co(3)   | 142.9(5) |
| C(72)-C(71)-N(17)   | 107.1(5) |
| N(18)-C(72)-C(71)   | 108.5(6) |
| N(18)-C(73)-C(76)   | 111.2(6) |
| N(18)-C(73)-C(75)   | 107.2(6) |

|                         |           |
|-------------------------|-----------|
| C(76)-C(73)-C(75)       | 110.6(7)  |
| N(18)-C(73)-C(74)       | 109.2(6)  |
| C(76)-C(73)-C(74)       | 107.9(7)  |
| C(75)-C(73)-C(74)       | 110.8(6)  |
| C(77)-N(19)-C(78)       | 110.2(6)  |
| C(77)-N(19)-B(3)        | 121.7(6)  |
| C(78)-N(19)-B(3)        | 127.8(6)  |
| C(77)-N(20)-C(79)       | 110.6(5)  |
| C(77)-N(20)-C(80)       | 124.1(6)  |
| C(79)-N(20)-C(80)       | 125.3(6)  |
| N(19)-C(77)-N(20)       | 104.6(6)  |
| N(19)-C(77)-Co(3)       | 114.4(4)  |
| N(20)-C(77)-Co(3)       | 140.8(5)  |
| C(79)-C(78)-N(19)       | 108.5(6)  |
| C(78)-C(79)-N(20)       | 106.1(7)  |
| C(82)-C(80)-N(20)       | 109.1(6)  |
| C(82)-C(80)-C(81)       | 111.2(7)  |
| N(20)-C(80)-C(81)       | 108.8(6)  |
| C(82)-C(80)-C(83)       | 108.6(7)  |
| N(20)-C(80)-C(83)       | 107.7(6)  |
| C(81)-C(80)-C(83)       | 111.4(7)  |
| C(89)-C(84)-C(85)       | 116.7(7)  |
| C(89)-C(84)-B(3)        | 118.8(6)  |
| C(85)-C(84)-B(3)        | 123.0(7)  |
| C(84)-C(85)-C(86)       | 122.7(9)  |
| C(87)-C(86)-C(85)       | 120.3(9)  |
| C(86)-C(87)-C(88)       | 119.4(9)  |
| C(87)-C(88)-C(89)       | 119.2(9)  |
| C(84)-C(89)-C(88)       | 121.7(8)  |
| N(99A)#1-C(90)-N(99B)#1 | 29.7(6)   |
| N(99A)#1-C(90)-C(92)    | 118.3(11) |
| N(99B)#1-C(90)-C(92)    | 107.9(12) |
| N(99A)#1-C(90)-C(91B)#1 | 130.8(14) |
| N(99B)#1-C(90)-C(91B)#1 | 116.4(13) |
| C(92)-C(90)-C(91B)#1    | 104.4(11) |
| N(99A)#1-C(90)-C(93B)   | 87.5(11)  |
| N(99B)#1-C(90)-C(93B)   | 117.1(12) |
| C(92)-C(90)-C(93B)      | 100.0(11) |
| C(91B)#1-C(90)-C(93B)   | 108.9(11) |
| N(99A)#1-C(90)-C(91A)#1 | 107.8(12) |
| N(99B)#1-C(90)-C(91A)#1 | 83.2(12)  |
| C(92)-C(90)-C(91A)#1    | 99.4(11)  |
| C(91B)#1-C(90)-C(91A)#1 | 38.1(9)   |
| C(93B)-C(90)-C(91A)#1   | 145.5(13) |
| N(99A)#1-C(90)-C(93A)   | 109.6(13) |
| N(99B)#1-C(90)-C(93A)   | 135.3(16) |

|                         |           |
|-------------------------|-----------|
| C(92)-C(90)-C(93A)      | 112(2)    |
| C(91B)#1-C(90)-C(93A)   | 72.5(18)  |
| C(93B)-C(90)-C(93A)     | 36.5(19)  |
| C(91A)#1-C(90)-C(93A)   | 109(2)    |
| N(99B)-N(99A)-C(90)#2   | 78(3)     |
| N(99B)-N(99A)-Co(3)     | 77(3)     |
| C(90)#2-N(99A)-Co(3)    | 154.3(12) |
| N(99A)-N(99B)-C(90)#2   | 73(3)     |
| N(99A)-N(99B)-Co(3)     | 80(3)     |
| C(90)#2-N(99B)-Co(3)    | 152.5(14) |
| C(91B)-C(91A)-C(90)#2   | 69(2)     |
| C(91A)-C(91B)-C(90)#2   | 73.1(17)  |
| C(91A)-C(91B)-C(93A)#2  | 129(2)    |
| C(90)#2-C(91B)-C(93A)#2 | 57.6(11)  |
| C(93B)-C(93A)-C(90)     | 64.9(15)  |
| C(93B)-C(93A)-C(91B)#1  | 115(2)    |
| C(90)-C(93A)-C(91B)#1   | 49.9(13)  |
| C(93A)-C(93B)-C(90)     | 79(3)     |

Symmetry transformations used to generate equivalent atoms:

#1 -x-1,y-1/2,-z+1 #2 -x-1,y+1/2,-z+1

**Table 4.** Anisotropic displacement parameters ( $\text{\AA}^2 \times 10^3$ ) for **LCoNH<sup>t</sup>Bu**.  
The anisotropic displacement factor exponent takes the form:  
 $-2 \pi^2 [ h^2 a^{*2} U11 + \dots + 2 h k a^* b^* U12 ]$

| Atom  | U11    | U22    | U33    | U23    | U13    | U12    |
|-------|--------|--------|--------|--------|--------|--------|
| Co(1) | 40(1)  | 33(1)  | 31(1)  | 1(1)   | 13(1)  | 5(1)   |
| B(1)  | 43(5)  | 31(4)  | 34(4)  | 1(3)   | 14(4)  | 1(4)   |
| N(1)  | 43(3)  | 32(3)  | 29(3)  | 3(2)   | 14(3)  | 7(3)   |
| N(2)  | 44(3)  | 48(4)  | 23(3)  | 10(3)  | 7(3)   | 12(3)  |
| C(1)  | 31(3)  | 42(4)  | 29(4)  | 7(3)   | 10(3)  | 7(3)   |
| C(2)  | 48(4)  | 23(4)  | 50(5)  | -4(3)  | 16(4)  | 8(3)   |
| C(3)  | 57(5)  | 30(4)  | 35(4)  | 9(3)   | 8(4)   | 19(3)  |
| C(4)  | 47(4)  | 53(5)  | 31(4)  | 8(3)   | 5(3)   | 7(4)   |
| C(5)  | 112(8) | 79(7)  | 42(5)  | 9(5)   | -10(5) | 32(6)  |
| C(6)  | 51(4)  | 66(6)  | 35(4)  | -3(4)  | 16(3)  | 0(4)   |
| C(7)  | 49(5)  | 85(7)  | 55(5)  | -19(5) | 15(4)  | 5(5)   |
| N(3)  | 35(3)  | 31(3)  | 32(3)  | 5(3)   | 8(2)   | 3(3)   |
| N(4)  | 34(3)  | 48(4)  | 39(3)  | 4(3)   | 16(3)  | 6(3)   |
| C(8)  | 44(4)  | 35(4)  | 31(4)  | 11(3)  | 15(3)  | 10(3)  |
| C(9)  | 40(4)  | 41(4)  | 41(4)  | 2(3)   | 11(3)  | 1(4)   |
| C(10) | 37(4)  | 56(5)  | 47(4)  | 1(4)   | 9(3)   | -3(4)  |
| C(11) | 42(4)  | 45(5)  | 55(5)  | -4(4)  | 20(4)  | 12(3)  |
| C(12) | 75(6)  | 59(6)  | 123(9) | -2(6)  | 43(6)  | 19(5)  |
| C(13) | 121(8) | 119(9) | 64(6)  | 3(6)   | 47(6)  | 58(8)  |
| C(14) | 48(5)  | 92(8)  | 131(9) | -25(6) | 35(5)  | 21(5)  |
| N(5)  | 35(3)  | 34(3)  | 30(3)  | 2(2)   | 12(2)  | 5(3)   |
| N(6)  | 33(3)  | 35(3)  | 26(3)  | 4(2)   | 8(2)   | 1(2)   |
| C(15) | 31(3)  | 29(4)  | 34(3)  | 4(3)   | 10(3)  | 2(3)   |
| C(16) | 34(3)  | 41(4)  | 24(3)  | -2(3)  | 7(3)   | 7(3)   |
| C(17) | 33(3)  | 39(5)  | 29(4)  | 7(3)   | 11(3)  | 5(3)   |
| C(18) | 40(4)  | 43(5)  | 41(4)  | 10(3)  | 12(3)  | -2(3)  |
| C(19) | 55(4)  | 42(4)  | 41(4)  | -1(4)  | 0(3)   | -3(4)  |
| C(20) | 58(5)  | 39(4)  | 54(5)  | 14(4)  | 13(4)  | 11(4)  |
| C(21) | 82(6)  | 50(5)  | 63(5)  | 9(4)   | 38(4)  | -10(5) |
| C(22) | 38(4)  | 33(4)  | 45(4)  | 0(3)   | 19(3)  | 2(3)   |
| C(23) | 45(4)  | 45(5)  | 68(5)  | 3(4)   | 19(4)  | 5(4)   |
| C(24) | 40(4)  | 38(5)  | 106(8) | -18(5) | 11(5)  | -10(4) |
| C(25) | 48(5)  | 61(6)  | 82(7)  | -37(5) | 20(5)  | 2(5)   |
| C(26) | 45(5)  | 93(8)  | 62(5)  | -32(5) | 30(4)  | -11(5) |
| C(27) | 46(4)  | 53(4)  | 36(4)  | -15(4) | 21(3)  | -1(4)  |
| N(97) | 95(5)  | 52(4)  | 59(4)  | -12(4) | 26(4)  | 4(4)   |



|        |         |         |         |         |         |          |
|--------|---------|---------|---------|---------|---------|----------|
| C(28)  | 54(5)   | 36(4)   | 49(4)   | -6(3)   | 12(4)   | 7(4)     |
| C(29)  | 96(7)   | 63(6)   | 66(6)   | -6(5)   | 34(5)   | 14(5)    |
| C(30)  | 95(8)   | 101(8)  | 79(7)   | -20(6)  | 25(6)   | 0(6)     |
| C(31)  | 99(7)   | 51(6)   | 101(8)  | 7(5)    | 39(6)   | 10(5)    |
| Co(2)  | 28(1)   | 33(1)   | 33(1)   | 2(1)    | 5(1)    | 3(1)     |
| B(2)   | 25(4)   | 35(5)   | 29(4)   | -1(3)   | 8(3)    | 0(3)     |
| N(8)   | 25(3)   | 30(3)   | 29(3)   | 1(2)    | 8(2)    | -1(2)    |
| N(9)   | 39(3)   | 28(3)   | 30(3)   | 6(2)    | 7(2)    | 2(3)     |
| C(32)  | 39(4)   | 33(4)   | 28(4)   | -4(3)   | 7(3)    | 2(3)     |
| C(33)  | 40(4)   | 32(4)   | 39(4)   | 2(3)    | 21(3)   | 0(3)     |
| C(34)  | 51(4)   | 28(4)   | 40(4)   | 4(3)    | 20(4)   | 0(3)     |
| C(35)  | 61(5)   | 54(5)   | 27(4)   | 3(3)    | -3(4)   | -1(4)    |
| C(36)  | 92(7)   | 89(7)   | 36(5)   | 24(4)   | 7(4)    | 3(5)     |
| C(37)  | 51(5)   | 68(6)   | 55(5)   | 13(4)   | -2(4)   | -9(4)    |
| C(38)  | 79(6)   | 61(6)   | 77(6)   | 1(5)    | -10(5)  | 33(5)    |
| N(10)  | 31(3)   | 29(3)   | 25(3)   | 3(2)    | 7(2)    | -2(2)    |
| N(11)  | 33(3)   | 25(3)   | 48(3)   | -4(3)   | 11(3)   | -6(3)    |
| C(39)  | 34(4)   | 37(4)   | 25(3)   | 6(3)    | 5(3)    | -1(3)    |
| C(40)  | 25(3)   | 29(4)   | 36(4)   | 1(3)    | 10(3)   | 5(3)     |
| C(41)  | 41(4)   | 25(4)   | 52(4)   | 0(3)    | 18(3)   | 5(3)     |
| C(42)  | 34(4)   | 44(5)   | 81(6)   | -13(4)  | 1(4)    | -5(4)    |
| C(43)  | 76(7)   | 173(14) | 168(12) | -37(11) | 75(8)   | -61(8)   |
| C(44)  | 81(7)   | 106(9)  | 147(12) | 9(8)    | -56(8)  | -41(7)   |
| C(45)  | 71(7)   | 47(7)   | 370(20) | -59(10) | -63(11) | -10(6)   |
| N(12)  | 33(3)   | 29(3)   | 28(3)   | -1(2)   | 5(2)    | 2(2)     |
| N(13)  | 31(3)   | 37(3)   | 33(3)   | 0(3)    | 12(2)   | 8(3)     |
| C(46)  | 31(4)   | 29(4)   | 36(4)   | 4(3)    | 9(3)    | 2(3)     |
| C(47)  | 34(4)   | 30(4)   | 33(4)   | 5(3)    | 3(3)    | 1(3)     |
| C(48)  | 50(4)   | 34(4)   | 29(4)   | -1(3)   | 14(3)   | 3(3)     |
| C(49)  | 43(4)   | 49(5)   | 40(4)   | -7(4)   | 22(3)   | 1(4)     |
| C(50)  | 37(4)   | 55(5)   | 60(5)   | 4(4)    | 24(4)   | 14(4)    |
| C(51)  | 52(4)   | 60(5)   | 76(5)   | 6(5)    | 35(4)   | -7(4)    |
| C(52)  | 68(5)   | 92(7)   | 64(6)   | -10(5)  | 40(5)   | 12(5)    |
| C(53)  | 29(3)   | 23(4)   | 29(4)   | 0(3)    | 6(3)    | -2(3)    |
| C(54)  | 35(4)   | 31(4)   | 32(4)   | 8(3)    | 7(3)    | 8(3)     |
| C(55)  | 32(4)   | 35(4)   | 52(5)   | -2(3)   | 19(3)   | 4(3)     |
| C(56)  | 29(4)   | 30(4)   | 57(5)   | -5(3)   | 3(3)    | 1(3)     |
| C(57)  | 37(4)   | 27(4)   | 39(4)   | 1(3)    | 6(3)    | 3(3)     |
| C(58)  | 34(4)   | 31(4)   | 38(4)   | 6(3)    | 12(3)   | 3(3)     |
| N(98)  | 39(4)   | 257(14) | 71(5)   | -47(7)  | -8(4)   | 52(6)    |
| C(59)  | 34(4)   | 86(7)   | 69(6)   | 18(5)   | 15(4)   | 8(4)     |
| C(60A) | 67(16)  | 80(20)  | 400(70) | 10(30)  | 100(30) | 4(14)    |
| C(60B) | 200(40) | 66(17)  | 91(17)  | 27(13)  | 0(20)   | 40(20)   |
| C(61)  | 64(6)   | 149(11) | 94(8)   | -19(8)  | -16(6)  | -5(7)    |
| C(62A) | 90(30)  | 210(40) | 44(13)  | -15(18) | 23(19)  | -70(30)  |
| C(62B) | 49(19)  | 380(70) | 130(40) | 70(40)  | -2(18)  | -120(30) |

|        |         |         |         |          |          |         |
|--------|---------|---------|---------|----------|----------|---------|
| Co(3)  | 31(1)   | 41(1)   | 30(1)   | 4(1)     | 3(1)     | 2(1)    |
| B(3)   | 26(4)   | 51(5)   | 34(4)   | 0(4)     | 5(3)     | 3(4)    |
| N(15)  | 30(3)   | 39(3)   | 36(3)   | 0(3)     | 12(3)    | 1(3)    |
| N(16)  | 45(3)   | 57(4)   | 38(3)   | 7(3)     | 19(3)    | 0(3)    |
| C(63)  | 52(4)   | 43(4)   | 28(4)   | -6(3)    | 13(3)    | -2(4)   |
| C(64)  | 35(4)   | 55(5)   | 54(5)   | -9(4)    | 16(4)    | 1(3)    |
| C(65)  | 47(5)   | 63(5)   | 47(5)   | 6(4)     | 25(4)    | -3(4)   |
| C(66)  | 48(4)   | 71(6)   | 34(4)   | 17(4)    | 12(4)    | 2(4)    |
| C(67)  | 78(7)   | 120(9)  | 86(7)   | 51(6)    | 32(5)    | 8(6)    |
| C(68)  | 93(7)   | 94(8)   | 86(7)   | 55(6)    | 38(6)    | 29(6)   |
| C(69)  | 83(7)   | 128(10) | 70(7)   | 28(7)    | -2(6)    | -2(7)   |
| N(17)  | 24(3)   | 39(3)   | 26(3)   | -1(2)    | 2(2)     | 5(2)    |
| N(18)  | 33(3)   | 42(3)   | 28(3)   | 2(3)     | 5(3)     | 6(3)    |
| C(70)  | 39(4)   | 36(4)   | 32(4)   | 1(3)     | 14(3)    | -1(3)   |
| C(71)  | 29(3)   | 58(5)   | 29(4)   | -8(3)    | -1(3)    | 11(4)   |
| C(72)  | 56(5)   | 49(4)   | 27(4)   | -5(3)    | 3(4)     | 4(4)    |
| C(73)  | 56(5)   | 44(5)   | 40(4)   | 5(3)     | 13(4)    | 25(4)   |
| C(74)  | 42(4)   | 65(6)   | 92(6)   | 3(5)     | 31(4)    | 2(4)    |
| C(75)  | 73(5)   | 45(5)   | 77(6)   | 5(4)     | 30(5)    | 20(4)   |
| C(76)  | 65(5)   | 72(6)   | 48(5)   | -2(4)    | 17(4)    | 21(5)   |
| N(19)  | 37(3)   | 31(3)   | 31(3)   | 1(2)     | 10(3)    | 4(3)    |
| N(20)  | 38(3)   | 53(4)   | 38(3)   | -6(3)    | 8(3)     | 0(3)    |
| C(77)  | 25(3)   | 40(4)   | 30(4)   | -5(3)    | 2(3)     | -6(3)   |
| C(78)  | 39(4)   | 53(5)   | 43(4)   | -2(4)    | 4(4)     | 8(4)    |
| C(79)  | 46(4)   | 43(5)   | 46(4)   | -7(4)    | 4(4)     | 3(4)    |
| C(80)  | 28(4)   | 65(5)   | 49(4)   | -14(4)   | 6(3)     | -6(4)   |
| C(81)  | 53(5)   | 96(7)   | 50(5)   | -15(5)   | 3(4)     | -7(5)   |
| C(82)  | 41(4)   | 87(7)   | 70(6)   | -26(5)   | 13(4)    | -8(4)   |
| C(83)  | 50(5)   | 79(7)   | 104(8)  | -46(6)   | -4(5)    | -30(5)  |
| C(84)  | 25(4)   | 51(5)   | 37(4)   | -8(3)    | 3(3)     | 5(3)    |
| C(85)  | 45(5)   | 58(5)   | 47(4)   | -16(4)   | 9(4)     | 9(4)    |
| C(86)  | 40(5)   | 92(8)   | 72(6)   | -45(6)   | -5(5)    | 14(5)   |
| C(87)  | 67(7)   | 89(8)   | 78(7)   | -25(7)   | -27(6)   | 37(6)   |
| C(88)  | 106(8)  | 60(6)   | 53(5)   | 11(5)    | -7(5)    | 36(6)   |
| C(89)  | 64(5)   | 48(5)   | 49(5)   | 0(4)     | 2(4)     | 8(4)    |
| C(90)  | 35(4)   | 57(5)   | 53(5)   | -22(4)   | -6(4)    | -5(4)   |
| N(99A) | 40(10)  | 81(11)  | 51(12)  | 38(10)   | 15(8)    | 6(8)    |
| N(99B) | 67(13)  | 88(15)  | 49(12)  | 11(10)   | 19(9)    | 23(11)  |
| C(91A) | 108(18) | 100(17) | 43(12)  | 22(11)   | -23(14)  | 16(16)  |
| C(91B) | 55(12)  | 103(17) | 51(12)  | -23(10)  | -24(11)  | -16(13) |
| C(92)  | 138(10) | 93(9)   | 75(7)   | -4(6)    | 15(7)    | -41(7)  |
| C(93A) | 120(30) | 390(70) | 450(80) | -320(60) | -160(40) | 200(40) |
| C(93B) | 40(10)  | 109(16) | 75(13)  | -1(12)   | 22(10)   | 34(11)  |

**Table 5.** Hydrogen coordinates ( $\times 10^4$ ) and equivalent isotropic displacement parameters ( $\text{\AA}^2 \times 10^3$ ) for **LCoNH<sup>t</sup>Bu**.

|        | x     | y     | z    | U(eq) |
|--------|-------|-------|------|-------|
| H(2)   | -5260 | 8524  | 7547 | 47    |
| H(3)   | -6049 | 8289  | 6756 | 50    |
| H(5A)  | -5981 | 7698  | 5987 | 125   |
| H(5B)  | -6843 | 7388  | 6128 | 125   |
| H(5C)  | -6626 | 6746  | 5711 | 125   |
| H(6A)  | -4724 | 6341  | 6149 | 75    |
| H(6B)  | -5310 | 5343  | 5864 | 75    |
| H(6C)  | -4772 | 5104  | 6372 | 75    |
| H(7A)  | -6983 | 5444  | 6476 | 94    |
| H(7B)  | -6205 | 4540  | 6579 | 94    |
| H(7C)  | -6734 | 4784  | 6070 | 94    |
| H(9)   | -2375 | 7041  | 8366 | 49    |
| H(10)  | -1307 | 5877  | 8110 | 56    |
| H(12A) | -2950 | 2817  | 7459 | 124   |
| H(12B) | -2193 | 2676  | 7911 | 124   |
| H(12C) | -2066 | 2208  | 7443 | 124   |
| H(13A) | -1960 | 5051  | 6947 | 146   |
| H(13B) | -2830 | 4321  | 6868 | 146   |
| H(13C) | -1967 | 3711  | 6820 | 146   |
| H(14A) | -753  | 4739  | 7623 | 132   |
| H(14B) | -726  | 3381  | 7532 | 132   |
| H(14C) | -818  | 3840  | 8008 | 132   |
| H(16)  | -5363 | 6302  | 8629 | 40    |
| H(17)  | -6118 | 4454  | 8656 | 40    |
| H(19A) | -5849 | 2550  | 7412 | 73    |
| H(19B) | -6744 | 2830  | 7523 | 73    |
| H(19C) | -6381 | 1537  | 7569 | 73    |
| H(20A) | -4522 | 2093  | 8043 | 76    |
| H(20B) | -5024 | 1052  | 8204 | 76    |
| H(20C) | -4588 | 2041  | 8553 | 76    |
| H(21A) | -6045 | 2397  | 8722 | 92    |
| H(21B) | -6497 | 1442  | 8362 | 92    |
| H(21C) | -6864 | 2732  | 8321 | 92    |
| H(23)  | -3875 | 8900  | 7960 | 62    |
| H(24)  | -3204 | 10213 | 8504 | 75    |
| H(25)  | -2859 | 9744  | 9261 | 76    |
| H(26)  | -3192 | 7900  | 9471 | 77    |
| H(27)  | -3848 | 6540  | 8939 | 52    |

|        |       |       |       |     |
|--------|-------|-------|-------|-----|
| H(97)  | -5093 | 3577  | 6667  | 81  |
| H(29A) | -4439 | 2509  | 6120  | 109 |
| H(29B) | -4250 | 1172  | 6236  | 109 |
| H(29C) | -3617 | 2138  | 6512  | 109 |
| H(30A) | -5929 | 2202  | 6225  | 137 |
| H(30B) | -6035 | 1676  | 6688  | 137 |
| H(30C) | -5690 | 880   | 6348  | 137 |
| H(31A) | -3846 | 1337  | 7246  | 122 |
| H(31B) | -4445 | 367   | 6950  | 122 |
| H(31C) | -4808 | 1156  | 7286  | 122 |
| H(33)  | -5002 | 4361  | 10846 | 42  |
| H(34)  | -4101 | 3566  | 11577 | 46  |
| H(36A) | -3056 | 3006  | 12127 | 111 |
| H(36B) | -2893 | 4336  | 12262 | 111 |
| H(36C) | -2149 | 3407  | 12445 | 111 |
| H(37A) | -1378 | 4926  | 11601 | 91  |
| H(37B) | -1117 | 4564  | 12121 | 91  |
| H(37C) | -1851 | 5510  | 11943 | 91  |
| H(38A) | -2349 | 2090  | 11584 | 117 |
| H(38B) | -1422 | 2448  | 11893 | 117 |
| H(38C) | -1699 | 2803  | 11372 | 117 |
| H(40)  | -4459 | 8186  | 10225 | 36  |
| H(41)  | -3271 | 9606  | 10478 | 46  |
| H(43A) | -995  | 7575  | 10452 | 196 |
| H(43B) | -433  | 8705  | 10622 | 196 |
| H(43C) | -1276 | 8788  | 10210 | 196 |
| H(44A) | -1458 | 8166  | 11481 | 191 |
| H(44B) | -540  | 8315  | 11378 | 191 |
| H(44C) | -1113 | 7199  | 11200 | 191 |
| H(45A) | -1834 | 10356 | 10630 | 275 |
| H(45B) | -1039 | 10245 | 11066 | 275 |
| H(45C) | -2001 | 10070 | 11109 | 275 |
| H(47)  | -4726 | 4532  | 9398  | 40  |
| H(48)  | -3638 | 3824  | 9002  | 44  |
| H(50A) | -1621 | 2530  | 9803  | 73  |
| H(50B) | -1228 | 3587  | 10127 | 73  |
| H(50C) | -748  | 3133  | 9765  | 73  |
| H(51A) | -1694 | 5822  | 9269  | 88  |
| H(51B) | -792  | 5166  | 9434  | 88  |
| H(51C) | -1270 | 5631  | 9795  | 88  |
| H(52A) | -2378 | 4138  | 8762  | 105 |
| H(52B) | -2402 | 2878  | 8971  | 105 |
| H(52C) | -1519 | 3379  | 8902  | 105 |
| H(54)  | -5460 | 5984  | 10680 | 39  |
| H(55)  | -6865 | 6713  | 10399 | 45  |
| H(56)  | -7352 | 7271  | 9641  | 48  |

|        |       |       |       |     |
|--------|-------|-------|-------|-----|
| H(57)  | -6403 | 7165  | 9168  | 42  |
| H(58)  | -4991 | 6473  | 9455  | 41  |
| H(98)  | -914  | 4606  | 11107 | 112 |
| H(60A) | 188   | 2759  | 11289 | 118 |
| H(60B) | -555  | 3203  | 10868 | 118 |
| H(60C) | -35   | 4106  | 11232 | 118 |
| H(61A) | 467   | 6166  | 11441 | 164 |
| H(61B) | 1177  | 5169  | 11507 | 164 |
| H(61C) | 352   | 5001  | 11699 | 164 |
| H(62A) | 377   | 6026  | 10571 | 127 |
| H(62B) | -227  | 5041  | 10289 | 127 |
| H(62C) | 771   | 4788  | 10509 | 127 |
| H(64)  | 1414  | 6582  | 6015  | 57  |
| H(65)  | 1123  | 7950  | 5362  | 60  |
| H(67A) | 548   | 10161 | 5245  | 139 |
| H(67B) | -80   | 10313 | 4751  | 139 |
| H(67C) | 550   | 9223  | 4864  | 139 |
| H(68A) | -632  | 10274 | 5601  | 132 |
| H(68B) | -1475 | 9494  | 5434  | 132 |
| H(68C) | -1279 | 10498 | 5117  | 132 |
| H(69A) | -671  | 7928  | 4624  | 146 |
| H(69B) | -1291 | 9027  | 4505  | 146 |
| H(69C) | -1491 | 8031  | 4824  | 146 |
| H(71)  | 348   | 6835  | 7391  | 48  |
| H(72)  | -775  | 7950  | 7637  | 55  |
| H(74A) | -3122 | 7411  | 6545  | 96  |
| H(74B) | -3606 | 8179  | 6836  | 96  |
| H(74C) | -2991 | 7145  | 7069  | 96  |
| H(75A) | -2412 | 9243  | 6306  | 94  |
| H(75B) | -1896 | 10119 | 6683  | 94  |
| H(75C) | -2920 | 10018 | 6582  | 94  |
| H(76A) | -2171 | 8516  | 7648  | 92  |
| H(76B) | -2762 | 9571  | 7413  | 92  |
| H(76C) | -1737 | 9656  | 7512  | 92  |
| H(78)  | -12   | 3587  | 6285  | 55  |
| H(79)  | -1338 | 2694  | 5810  | 56  |
| H(81A) | -2348 | 4528  | 4839  | 102 |
| H(81B) | -2650 | 5699  | 5028  | 102 |
| H(81C) | -3351 | 4788  | 4766  | 102 |
| H(82A) | -3373 | 4401  | 5933  | 100 |
| H(82B) | -3986 | 4711  | 5448  | 100 |
| H(82C) | -3277 | 5618  | 5705  | 100 |
| H(83A) | -2925 | 2571  | 5644  | 123 |
| H(83B) | -2514 | 2574  | 5224  | 123 |
| H(83C) | -3519 | 2822  | 5149  | 123 |
| H(85)  | 1703  | 6890  | 6732  | 60  |

|        |       |      |      |     |
|--------|-------|------|------|-----|
| H(86)  | 2885  | 6308 | 7337 | 86  |
| H(87)  | 2770  | 4699 | 7770 | 104 |
| H(88)  | 1456  | 3616 | 7599 | 94  |
| H(89)  | 265   | 4231 | 6991 | 67  |
| H(99A) | -2816 | 7542 | 5886 | 68  |
| H(91A) | -4215 | 7323 | 4628 | 115 |
| H(91B) | -4341 | 8694 | 4618 | 115 |
| H(91C) | -4084 | 8023 | 5089 | 115 |
| H(92A) | -6912 | 5009 | 4870 | 157 |
| H(92B) | -6494 | 5066 | 4453 | 157 |
| H(92C) | -5888 | 5003 | 4956 | 157 |
| H(93A) | -5022 | 2362 | 4668 | 144 |
| H(93B) | -5839 | 2489 | 4868 | 144 |
| H(93C) | -5160 | 3522 | 4922 | 144 |
| H(97)  | -2645 | 8070 | 5456 | 67  |

---

## **LCoN<sup>t</sup>Bu**

### **Structure Determination.**

Violet / magenta crystals were shipped over dry ice and kept at -70C for a few days. For the structure determination a prismatic crystal 0.15 x 0.14 x 0.10 mm in size was mounted on a standard Bruker X8 Apex2 CCD-based X-ray diffractometer equipped with an Oxford Cryostream 700 low temperature device. Intensities were measured at 223(2) K using graphite monochromatized Mo-K $\alpha$  radiation ( $\lambda = 0.71073 \text{ \AA}$ ). A full sphere of data, 3537 frames each at 5.000 cm detector distance, was collected with scan width of 0.50° in  $\omega$  and phi and an exposure time of 15 s/frame. Analysis of the frames showed negligible decay during data collection. The data were integrated using the Bruker SAINT software package with a narrow frame algorithm<sup>1</sup> yielding a total of 42722 reflections of which 4150 independent. The SADABS program was used for the absorption correction.<sup>2</sup>

The structure was solved by direct methods and refined by full matrix least-squares techniques with the SHELX97 software package.<sup>3</sup> The reflection conditions indicated P2<sub>1</sub>/n (#14) as the only possible space group. The initial solution resulted in R-factor of c.a. 13% and the refinement was consequently carried out. First all non-hydrogen atoms have been found and assigned from the Fourier maps and their thermal parameters refined anisotropically. Next, the hydrogen atoms bonded to C-atoms have been added to the refinement as riding models and their thermal parameters refined isotropically. The main crystallographic details are summarized in Table 6.

**Table 6.** Crystal data and structure refinement for **LCoN<sup>t</sup>Bu**.

|                                   |                                                                                                                         |
|-----------------------------------|-------------------------------------------------------------------------------------------------------------------------|
| Empirical formula                 | [C <sub>32</sub> H <sub>48</sub> BCoN <sub>7</sub> ] 1/2 (C <sub>6</sub> H <sub>4</sub> O <sub>2</sub> )                |
| Formula weight                    | 654.09                                                                                                                  |
| Temperature                       | 293(2) K                                                                                                                |
| Wavelength                        | 0.71073 Å                                                                                                               |
| Crystal system, space group       | Monoclinic, P21/n (#14)                                                                                                 |
| Unit cell dimensions              | a = 9.6389(3) Å    alpha = 90 deg.<br>b = 20.8449(7) Å    beta = 100.028(2) deg.<br>c = 17.1780(6) Å    gamma = 90 deg. |
| Volume, Z                         | 3398.7(2) Å <sup>3</sup> , 4                                                                                            |
| Calculated density                | 1.201 g/cm <sup>3</sup>                                                                                                 |
| Absorption coefficient            | 0.538 mm <sup>-1</sup>                                                                                                  |
| F(000)                            | 1312                                                                                                                    |
| Crystal size                      | 0.15 x 0.14 x 0.10 mm                                                                                                   |
| Theta range for data collection   | 1.55 to 22.00 deg.                                                                                                      |
| Limiting indices                  | -10 ≤ h ≤ 9, -20 ≤ k ≤ 21, -18 ≤ l ≤ 18                                                                                 |
| Reflections collected / unique    | 42722 / 4150 [R(int) = 0.0304]                                                                                          |
| Refinement method                 | Full-matrix least-squares on F <sup>2</sup>                                                                             |
| Data / restraints / parameters    | 4150 / 0 / 399                                                                                                          |
| Goodness-of-fit on F <sup>2</sup> | 1.150                                                                                                                   |
| Final R indices [I > 2σ(I)]       | R1 = 0.0519, wR2 = 0.1651                                                                                               |
| R indices (all data)              | R1 = 0.0593, wR2 = 0.1783                                                                                               |
| Extinction coefficient            | 0.0130(17)                                                                                                              |
| Largest diff. peak and hole       | 0.970 and -0.357 e.Å <sup>-3</sup>                                                                                      |



**Table 2.** Atomic coordinates ( $\times 10^4$ ) and equivalent isotropic displacement parameters ( $\text{\AA}^2 \times 10^3$ ) for **LCoN<sup>t</sup>Bu**.

U(eq) is defined as one third of the trace of the orthogonalized Uij tensor.

|       | x        | y       | z       | U(eq)  |
|-------|----------|---------|---------|--------|
| Co(1) | 3452(1)  | 2392(1) | 9652(1) | 21(1)  |
| B(1)  | 3968(5)  | 3543(2) | 8562(3) | 26(1)  |
| N(11) | 578(3)   | 3064(2) | 9043(2) | 32(1)  |
| N(12) | 2377(3)  | 3454(2) | 8607(2) | 27(1)  |
| C(11) | 2004(4)  | 2978(2) | 9069(2) | 26(1)  |
| C(12) | 120(4)   | 3589(2) | 8580(2) | 39(1)  |
| C(13) | 1232(4)  | 3835(2) | 8314(2) | 35(1)  |
| C(14) | -347(5)  | 2677(2) | 9473(3) | 39(1)  |
| C(15) | -1868(5) | 2915(3) | 9275(3) | 59(2)  |
| C(16) | -280(5)  | 1987(2) | 9215(3) | 53(1)  |
| C(17) | 168(5)   | 2771(3) | 359(3)  | 49(1)  |
| N(21) | 4475(3)  | 2885(2) | 8306(2) | 23(1)  |
| N(22) | 5045(3)  | 1878(2) | 8366(2) | 27(1)  |
| C(21) | 4398(4)  | 2346(2) | 8738(2) | 23(1)  |
| C(22) | 5098(4)  | 2755(2) | 7659(2) | 29(1)  |
| C(23) | 5452(4)  | 2135(2) | 7693(2) | 33(1)  |
| C(24) | 5343(4)  | 1202(2) | 8628(2) | 30(1)  |
| C(25) | 3965(5)  | 834(2)  | 8521(3) | 42(1)  |
| C(26) | 6334(6)  | 892(2)  | 8144(3) | 50(1)  |
| C(27) | 6061(5)  | 1206(2) | 9489(3) | 40(1)  |
| N(31) | 5230(3)  | 3398(2) | 693(2)  | 29(1)  |
| N(32) | 4657(3)  | 3636(2) | 9447(2) | 26(1)  |
| C(31) | 4567(4)  | 3158(2) | 9977(2) | 24(1)  |
| C(32) | 5645(5)  | 4025(2) | 600(3)  | 40(1)  |
| C(33) | 5283(5)  | 4167(2) | 9831(3) | 36(1)  |
| C(34) | 5494(4)  | 3052(2) | 1467(2) | 35(1)  |
| C(35) | 4089(5)  | 2938(3) | 1728(3) | 55(1)  |
| C(36) | 6268(6)  | 2432(2) | 1356(3) | 51(1)  |
| C(37) | 6436(5)  | 3455(3) | 2088(3) | 51(1)  |
| N(41) | 3145(3)  | 1778(2) | 213(2)  | 27(1)  |
| C(41) | 2882(5)  | 1235(2) | 707(2)  | 35(1)  |
| C(42) | 1924(9)  | 1443(3) | 1274(4) | 95(3)  |
| C(43) | 2183(9)  | 696(3)  | 209(4)  | 94(3)  |
| C(44) | 4248(7)  | 988(4)  | 1178(5) | 110(3) |
| C(51) | 4318(4)  | 4092(2) | 7960(2) | 31(1)  |
| C(52) | 3448(5)  | 4197(2) | 7235(3) | 40(1)  |

|       |          |         |         |       |
|-------|----------|---------|---------|-------|
| C(53) | 3766(6)  | 4641(3) | 6699(3) | 53(1) |
| C(54) | 4978(6)  | 5001(2) | 6866(3) | 57(2) |
| C(55) | 5894(6)  | 4891(2) | 7552(3) | 54(1) |
| C(56) | 5572(5)  | 4437(2) | 8089(3) | 41(1) |
| C(61) | 4616(10) | 256(4)  | 5700(5) | 37(2) |
| C(62) | 5986(10) | 361(4)  | 5502(5) | 41(2) |
| C(63) | 3643(9)  | -130(4) | 5150(5) | 40(2) |
| O(61) | 4279(8)  | 490(3)  | 6292(4) | 59(2) |

---

**Table 3.** Bond lengths [Å] and angles [deg] for **LCoN<sup>t</sup>Bu**.

---

|               |          |
|---------------|----------|
| Co(1)-N(41)#1 | 1.660(3) |
| Co(1)-C(21)   | 1.949(4) |
| Co(1)-C(31)   | 1.952(4) |
| Co(1)-C(11)   | 1.988(4) |
| B(1)-N(21)    | 1.544(6) |
| B(1)-N(12)    | 1.560(5) |
| B(1)-N(32)    | 1.561(5) |
| B(1)-C(51)    | 1.617(6) |
| N(11)-C(11)   | 1.379(5) |
| N(11)-C(12)   | 1.379(6) |
| N(11)-C(14)   | 1.491(6) |
| N(12)-C(11)   | 1.359(5) |
| N(12)-C(13)   | 1.381(5) |
| C(12)-C(13)   | 1.339(6) |
| C(14)-C(16)   | 1.510(7) |
| C(14)-C(17)#1 | 1.528(7) |
| C(14)-C(15)   | 1.528(7) |
| C(17)-C(14)#2 | 1.528(7) |
| N(21)-C(21)   | 1.356(5) |
| N(21)-C(22)   | 1.379(5) |
| N(22)-C(21)   | 1.375(5) |
| N(22)-C(23)   | 1.390(5) |
| N(22)-C(24)   | 1.492(5) |
| C(22)-C(23)   | 1.335(6) |
| C(24)-C(25)   | 1.517(6) |
| C(24)-C(26)   | 1.517(6) |
| C(24)-C(27)   | 1.519(6) |
| N(31)-C(31)#2 | 1.378(5) |
| N(31)-C(32)   | 1.383(5) |
| N(31)-C(34)   | 1.496(5) |
| N(32)-C(31)   | 1.361(5) |
| N(32)-C(33)   | 1.373(5) |
| C(31)-N(31)#1 | 1.378(5) |
| C(32)-C(33)#2 | 1.341(6) |
| C(33)-C(32)#1 | 1.341(6) |
| C(34)-C(35)   | 1.518(6) |
| C(34)-C(36)   | 1.520(7) |
| C(34)-C(37)   | 1.527(6) |
| N(41)-C(41)   | 1.463(5) |
| N(41)-Co(1)#2 | 1.660(3) |
| C(41)-C(43)   | 1.500(7) |
| C(41)-C(44)   | 1.511(8) |

|               |           |
|---------------|-----------|
| C(41)-C(42)   | 1.517(7)  |
| C(51)-C(56)   | 1.390(6)  |
| C(51)-C(52)   | 1.393(6)  |
| C(52)-C(53)   | 1.377(6)  |
| C(53)-C(54)   | 1.375(8)  |
| C(54)-C(55)   | 1.364(8)  |
| C(55)-C(56)   | 1.395(7)  |
| C(61)-O(61)   | 1.223(10) |
| C(61)-C(62)   | 1.437(14) |
| C(61)-C(63)   | 1.452(13) |
| C(62)-C(63)#3 | 1.323(13) |
| C(63)-C(62)#3 | 1.323(13) |

|                     |            |
|---------------------|------------|
| N(41)#1-Co(1)-C(21) | 125.82(15) |
| N(41)#1-Co(1)-C(31) | 127.58(16) |
| C(21)-Co(1)-C(31)   | 87.67(15)  |
| N(41)#1-Co(1)-C(11) | 125.81(16) |
| C(21)-Co(1)-C(11)   | 90.64(15)  |
| C(31)-Co(1)-C(11)   | 86.84(15)  |
| N(21)-B(1)-N(12)    | 105.8(3)   |
| N(21)-B(1)-N(32)    | 106.6(3)   |
| N(12)-B(1)-N(32)    | 102.8(3)   |
| N(21)-B(1)-C(51)    | 109.5(3)   |
| N(12)-B(1)-C(51)    | 115.6(3)   |
| N(32)-B(1)-C(51)    | 115.7(3)   |
| C(11)-N(11)-C(12)   | 109.9(3)   |
| C(11)-N(11)-C(14)   | 126.3(3)   |
| C(12)-N(11)-C(14)   | 123.8(3)   |
| C(11)-N(12)-C(13)   | 110.9(3)   |
| C(11)-N(12)-B(1)    | 118.5(3)   |
| C(13)-N(12)-B(1)    | 130.1(3)   |
| N(12)-C(11)-N(11)   | 104.4(3)   |
| N(12)-C(11)-Co(1)   | 120.6(3)   |
| N(11)-C(11)-Co(1)   | 134.8(3)   |
| C(13)-C(12)-N(11)   | 107.8(4)   |
| C(12)-C(13)-N(12)   | 106.9(4)   |
| N(11)-C(14)-C(16)   | 108.0(4)   |
| N(11)-C(14)-C(17)#1 | 107.8(4)   |
| C(16)-C(14)-C(17)#1 | 113.0(4)   |
| N(11)-C(14)-C(15)   | 110.3(4)   |
| C(16)-C(14)-C(15)   | 109.4(4)   |
| C(17)#1-C(14)-C(15) | 108.2(4)   |
| C(21)-N(21)-C(22)   | 110.5(3)   |
| C(21)-N(21)-B(1)    | 122.0(3)   |
| C(22)-N(21)-B(1)    | 127.5(3)   |
| C(21)-N(22)-C(23)   | 109.2(3)   |

|                     |          |
|---------------------|----------|
| C(21)-N(22)-C(24)   | 127.5(3) |
| C(23)-N(22)-C(24)   | 123.3(3) |
| N(21)-C(21)-N(22)   | 105.1(3) |
| N(21)-C(21)-Co(1)   | 118.5(3) |
| N(22)-C(21)-Co(1)   | 136.3(3) |
| C(23)-C(22)-N(21)   | 107.4(3) |
| C(22)-C(23)-N(22)   | 107.6(3) |
| N(22)-C(24)-C(25)   | 108.9(3) |
| N(22)-C(24)-C(26)   | 110.1(3) |
| C(25)-C(24)-C(26)   | 109.8(4) |
| N(22)-C(24)-C(27)   | 108.7(3) |
| C(25)-C(24)-C(27)   | 111.2(4) |
| C(26)-C(24)-C(27)   | 108.2(4) |
| C(31)#2-N(31)-C(32) | 109.8(3) |
| C(31)#2-N(31)-C(34) | 126.8(3) |
| C(32)-N(31)-C(34)   | 123.4(3) |
| C(31)-N(32)-C(33)   | 110.0(3) |
| C(31)-N(32)-B(1)    | 119.6(3) |
| C(33)-N(32)-B(1)    | 130.1(3) |
| N(32)-C(31)-N(31)#1 | 105.0(3) |
| N(32)-C(31)-Co(1)   | 120.2(3) |
| N(31)#1-C(31)-Co(1) | 134.4(3) |
| C(33)#2-C(32)-N(31) | 107.0(4) |
| C(32)#1-C(33)-N(32) | 108.2(4) |
| N(31)-C(34)-C(35)   | 108.4(3) |
| N(31)-C(34)-C(36)   | 108.0(3) |
| C(35)-C(34)-C(36)   | 112.8(4) |
| N(31)-C(34)-C(37)   | 110.1(4) |
| C(35)-C(34)-C(37)   | 109.5(4) |
| C(36)-C(34)-C(37)   | 108.1(4) |
| C(41)-N(41)-Co(1)#2 | 179.7(3) |
| N(41)-C(41)-C(43)   | 110.7(4) |
| N(41)-C(41)-C(44)   | 110.6(4) |
| C(43)-C(41)-C(44)   | 108.2(6) |
| N(41)-C(41)-C(42)   | 109.8(4) |
| C(43)-C(41)-C(42)   | 108.5(5) |
| C(44)-C(41)-C(42)   | 108.9(5) |
| C(56)-C(51)-C(52)   | 115.6(4) |
| C(56)-C(51)-B(1)    | 122.5(4) |
| C(52)-C(51)-B(1)    | 121.6(4) |
| C(53)-C(52)-C(51)   | 122.4(5) |
| C(54)-C(53)-C(52)   | 120.4(5) |
| C(55)-C(54)-C(53)   | 119.2(4) |
| C(54)-C(55)-C(56)   | 120.0(5) |
| C(51)-C(56)-C(55)   | 122.2(5) |

|                     |          |
|---------------------|----------|
| O(61)-C(61)-C(62)   | 121.6(8) |
| O(61)-C(61)-C(63)   | 121.9(9) |
| C(62)-C(61)-C(63)   | 116.5(7) |
| C(63)#3-C(62)-C(61) | 122.7(8) |
| C(62)#3-C(63)-C(61) | 120.8(9) |

---

Symmetry transformations used to generate equivalent atoms:

#1  $x, y, z+1$  #2  $x, y, z-1$  #3  $-x+1, -y, -z+1$

**Table 4.** Anisotropic displacement parameters ( $\text{\AA}^2 \times 10^3$ ) for **LCoN<sup>t</sup>Bu**.

The anisotropic displacement factor exponent takes the form:

$$-2 \pi^2 [ h^2 a^{*2} U_{11} + \dots + 2 h k a^* b^* U_{12} ]$$

---

|       | U11    | U22   | U33    | U23   | U13    | U12    |
|-------|--------|-------|--------|-------|--------|--------|
| Co(1) | 22(1)  | 20(1) | 22(1)  | 1(1)  | 7(1)   | -2(1)  |
| B(1)  | 25(2)  | 25(2) | 29(2)  | 1(2)  | 6(2)   | 0(2)   |
| N(11) | 21(2)  | 41(2) | 33(2)  | 3(2)  | 5(1)   | 0(2)   |
| N(12) | 27(2)  | 25(2) | 30(2)  | 3(1)  | 6(1)   | 3(1)   |
| C(11) | 26(2)  | 28(2) | 25(2)  | -2(2) | 7(2)   | -2(2)  |
| C(12) | 27(2)  | 52(3) | 39(2)  | 8(2)  | 5(2)   | 12(2)  |
| C(13) | 34(2)  | 37(2) | 34(2)  | 9(2)  | 6(2)   | 11(2)  |
| C(14) | 24(2)  | 50(3) | 43(3)  | 5(2)  | 9(2)   | -5(2)  |
| C(15) | 22(2)  | 85(4) | 72(4)  | 11(3) | 13(2)  | -3(3)  |
| C(16) | 39(3)  | 53(3) | 68(3)  | 0(3)  | 11(2)  | -18(2) |
| C(17) | 38(3)  | 70(3) | 44(3)  | 9(2)  | 18(2)  | 1(2)   |
| N(21) | 23(2)  | 23(2) | 24(2)  | 3(1)  | 6(1)   | -1(1)  |
| N(22) | 29(2)  | 23(2) | 31(2)  | 0(1)  | 12(1)  | 1(1)   |
| C(21) | 20(2)  | 25(2) | 25(2)  | 0(2)  | 3(2)   | -2(2)  |
| C(22) | 34(2)  | 30(2) | 26(2)  | 5(2)  | 13(2)  | -1(2)  |
| C(23) | 38(2)  | 35(3) | 30(2)  | -1(2) | 18(2)  | 3(2)   |
| C(24) | 32(2)  | 20(2) | 38(2)  | 2(2)  | 12(2)  | 2(2)   |
| C(25) | 39(2)  | 29(2) | 57(3)  | 5(2)  | 4(2)   | -3(2)  |
| C(26) | 64(3)  | 31(3) | 60(3)  | 3(2)  | 29(3)  | 10(2)  |
| C(27) | 37(2)  | 35(2) | 48(3)  | 5(2)  | 2(2)   | 7(2)   |
| N(31) | 33(2)  | 25(2) | 27(2)  | -3(1) | 4(1)   | -5(2)  |
| N(32) | 28(2)  | 21(2) | 29(2)  | 0(2)  | 8(1)   | -2(1)  |
| C(31) | 21(2)  | 25(2) | 28(2)  | 1(2)  | 8(2)   | 3(2)   |
| C(32) | 52(3)  | 31(3) | 36(3)  | -6(2) | 6(2)   | -15(2) |
| C(33) | 46(3)  | 22(2) | 42(3)  | -2(2) | 12(2)  | -9(2)  |
| C(34) | 39(2)  | 40(3) | 25(2)  | -2(2) | 1(2)   | -7(2)  |
| C(35) | 58(3)  | 75(4) | 32(3)  | -2(2) | 11(2)  | -17(3) |
| C(36) | 63(3)  | 44(3) | 40(3)  | 5(2)  | -10(3) | 7(2)   |
| C(37) | 57(3)  | 57(3) | 34(3)  | -5(2) | -4(2)  | -14(3) |
| N(41) | 29(2)  | 26(2) | 26(2)  | -1(1) | 10(1)  | -1(1)  |
| C(41) | 48(3)  | 27(2) | 31(2)  | 5(2)  | 15(2)  | -6(2)  |
| C(42) | 174(7) | 47(3) | 93(5)  | 20(3) | 102(5) | 4(4)   |
| C(43) | 168(7) | 53(4) | 58(4)  | 8(3)  | 11(4)  | -61(4) |
| C(44) | 71(4)  | 96(5) | 159(7) | 99(5) | 6(4)   | 3(4)   |

---

|       |       |       |       |        |        |        |
|-------|-------|-------|-------|--------|--------|--------|
| C(51) | 35(2) | 24(2) | 36(2) | 4(2)   | 13(2)  | 4(2)   |
| C(52) | 38(2) | 47(3) | 38(3) | 13(2)  | 14(2)  | 8(2)   |
| C(53) | 56(3) | 59(3) | 49(3) | 26(3)  | 23(2)  | 26(3)  |
| C(54) | 88(4) | 35(3) | 58(3) | 20(2)  | 46(3)  | 18(3)  |
| C(55) | 75(4) | 36(3) | 62(3) | -7(2)  | 43(3)  | -20(3) |
| C(56) | 49(3) | 38(3) | 39(2) | -1(2)  | 19(2)  | -7(2)  |
| C(61) | 51(6) | 21(4) | 34(5) | 6(4)   | -8(4)  | 23(4)  |
| C(62) | 60(6) | 25(5) | 25(5) | -1(4)  | -30(4) | 16(4)  |
| C(63) | 33(5) | 36(5) | 48(6) | 16(4)  | -3(4)  | 25(4)  |
| O(61) | 97(5) | 52(4) | 28(3) | -15(3) | 13(3)  | 21(4)  |

---



**Table 5.** Hydrogen coordinates ( $\times 10^4$ ) and isotropic displacement parameters ( $\text{\AA}^2 \times 10^3$ ) for **LCoN<sup>t</sup>Bu**.

|        | x     | y    | z    | U(eq) |
|--------|-------|------|------|-------|
| H(12)  | -798  | 3744 | 8472 | 47    |
| H(13)  | 1234  | 4195 | 7993 | 42    |
| H(15A) | -1911 | 3354 | 9438 | 88    |
| H(15B) | -2455 | 2657 | 9548 | 88    |
| H(15C) | -2192 | 2884 | 8716 | 88    |
| H(16A) | -609  | 1956 | 8656 | 80    |
| H(16B) | -863  | 1728 | 9489 | 80    |
| H(16C) | 676   | 1838 | 9336 | 80    |
| H(17A) | 1147  | 2658 | 487  | 74    |
| H(17B) | -368  | 2503 | 650  | 74    |
| H(17C) | 50    | 3212 | 495  | 74    |
| H(22)  | 5245  | 3045 | 7271 | 35    |
| H(23)  | 5891  | 1915 | 7333 | 39    |
| H(25A) | 3532  | 841  | 7974 | 63    |
| H(25B) | 3346  | 1029 | 8834 | 63    |
| H(25C) | 4147  | 398  | 8689 | 63    |
| H(26A) | 5899  | 885  | 7597 | 74    |
| H(26B) | 6536  | 460  | 8325 | 74    |
| H(26C) | 7194  | 1133 | 8203 | 74    |
| H(27A) | 6928  | 1442 | 9539 | 60    |
| H(27B) | 6256  | 773  | 9665 | 60    |
| H(27C) | 5454  | 1406 | 9805 | 60    |
| H(32)  | 6091  | 4296 | 996  | 48    |
| H(33)  | 5430  | 4558 | 9597 | 44    |
| H(35A) | 3644  | 3342 | 1789 | 82    |
| H(35B) | 4239  | 2713 | 2223 | 82    |
| H(35C) | 3495  | 2686 | 1337 | 82    |
| H(36A) | 7146  | 2531 | 1191 | 77    |
| H(36B) | 5701  | 2175 | 959  | 77    |
| H(36C) | 6445  | 2200 | 1846 | 77    |
| H(37A) | 7323  | 3530 | 1922 | 76    |
| H(37B) | 6592  | 3231 | 2584 | 76    |
| H(37C) | 5986  | 3858 | 2149 | 76    |
| H(42A) | 2356  | 1790 | 1595 | 143   |
| H(42B) | 1775  | 1088 | 1606 | 143   |
| H(42C) | 1037  | 1582 | 979  | 143   |

|        |      |      |      |     |
|--------|------|------|------|-----|
| H(43A) | 1326 | 847  | -108 | 141 |
| H(43B) | 1973 | 354  | 545  | 141 |
| H(43C) | 2804 | 540  | -130 | 141 |
| H(44A) | 4713 | 1327 | 1501 | 166 |
| H(44B) | 4846 | 839  | 824  | 166 |
| H(44C) | 4054 | 640  | 1510 | 166 |
| H(52)  | 2623 | 3960 | 7109 | 48  |
| H(53)  | 3157 | 4698 | 6221 | 63  |
| H(54)  | 5170 | 5315 | 6515 | 68  |
| H(55)  | 6734 | 5119 | 7662 | 65  |
| H(56)  | 6218 | 4362 | 8549 | 49  |
| H(62)  | 6640 | 600  | 5846 | 50  |
| H(63)  | 2749 | -217 | 5258 | 48  |

---

---

References:

<sup>1</sup> Saint Plus, v. 7.01, Bruker Analytical X-ray, Madison, WI, 2003.

<sup>2</sup> Sheldrick, G.M. SADABS, v. 2.10. Program for Empirical Absorption Correction of Area Detector Data, University of Gottingen: Gottingen, Germany, 2003.

<sup>3</sup> Sheldrick, G. M. SHELX97 (Includes SHELXS97, SHELXL97, CIFTAB) - Programs for Crystal Structure Analysis (Release 97-2). Institut für Anorganische Chemie der Universität, Tammanstrasse 4, D-3400 Göttingen, Germany, **1998**.

<sup>4</sup> (a) Spek, A. L. *Acta Crystallogr.*, Sect A **1990**, C34, 46-57. (b) Spek, A. L., PLATON, A Multipurpose Crystallographic Tool, Utrecht University, Utrecht, The Netherlands, **1998**.
